# Supplementary material
Source: PubMed Central journal article supplement (PMC4037865)

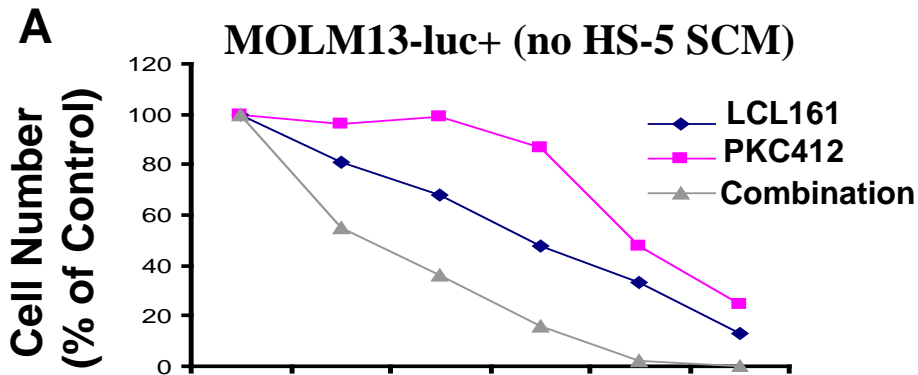

|             |   |              |            |             |             |              |
|-------------|---|--------------|------------|-------------|-------------|--------------|
| LCL161 (nM) | 0 | 1000         | 2000       | 4000        | 8000        | 16000        |
| PKC412 (nM) | 0 | 2.5          | 5          | 10          | 20          | 40           |
| Combination | 0 | 1000+<br>2.5 | 2000+<br>5 | 4000+<br>10 | 8000+<br>20 | 16000+<br>40 |

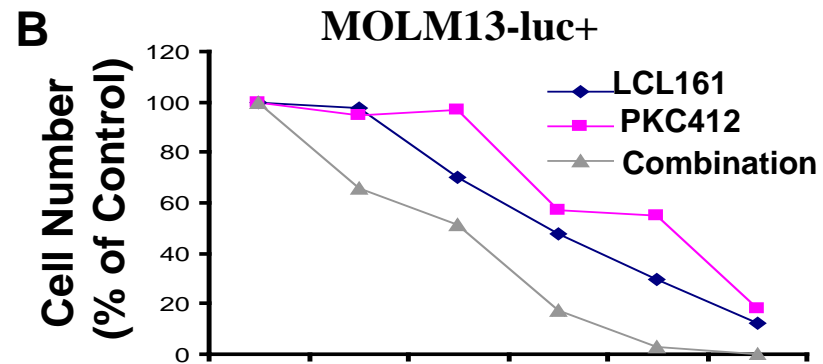

|             |   |              |            |             |             |              |
|-------------|---|--------------|------------|-------------|-------------|--------------|
| LCL161 (nM) | 0 | 1000         | 2000       | 4000        | 8000        | 16000        |
| PKC412 (nM) | 0 | 2.5          | 5          | 10          | 20          | 40           |
| Combination | 0 | 1000+<br>2.5 | 2000+<br>5 | 4000+<br>10 | 8000+<br>20 | 16000+<br>40 |

**C**

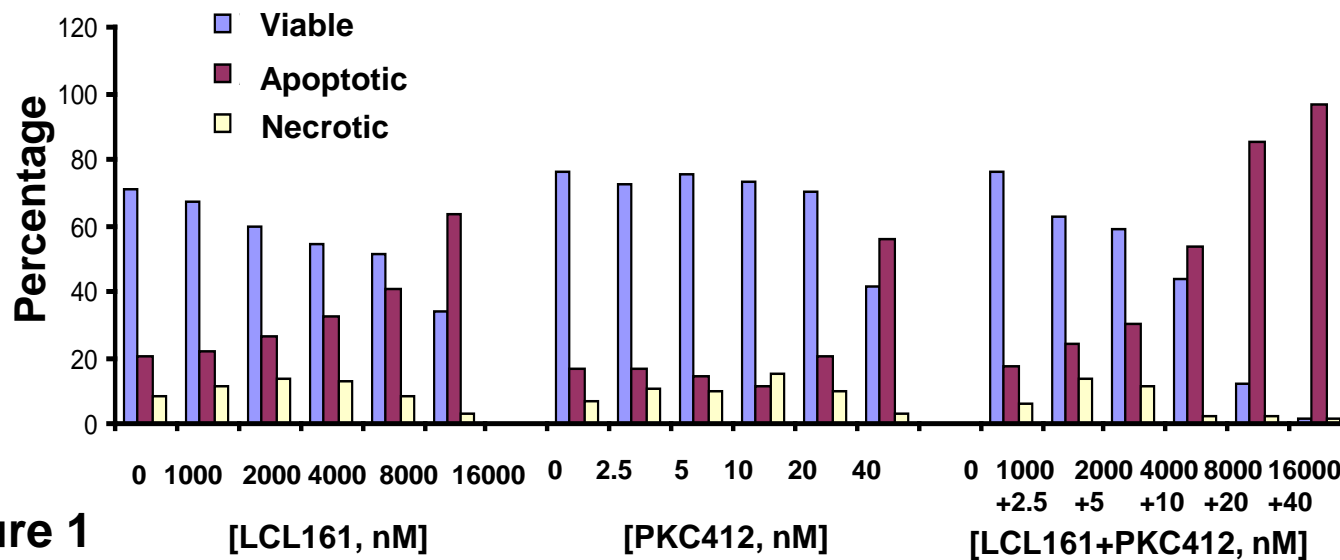

Supp Figure 1

Supplement: NIHMS584747-supplement-Supp_Figure_1.pdf [file NIHMS584747-supplement-Supp_Figure_1.pdf]

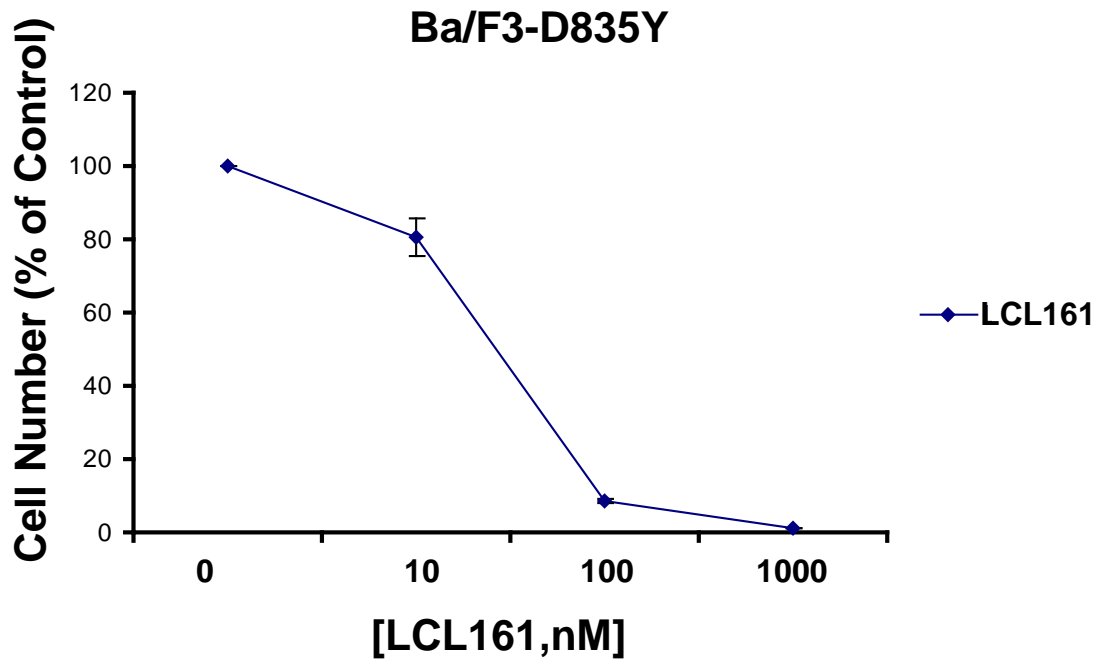

**Supp Figure 2**

Supplement: NIHMS584747-supplement-Supp_Figure_2.pdf [file NIHMS584747-supplement-Supp_Figure_2.pdf]

**A**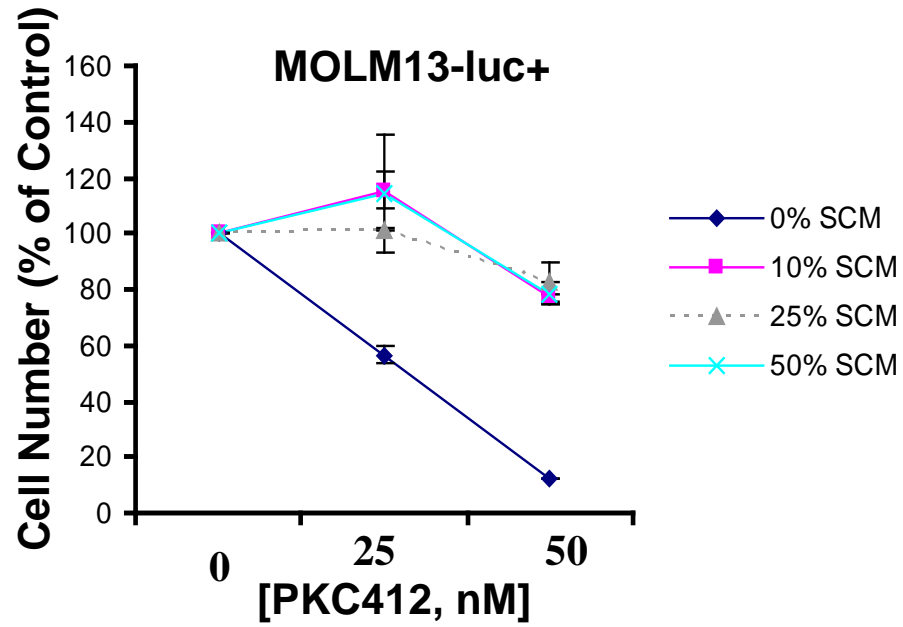**B**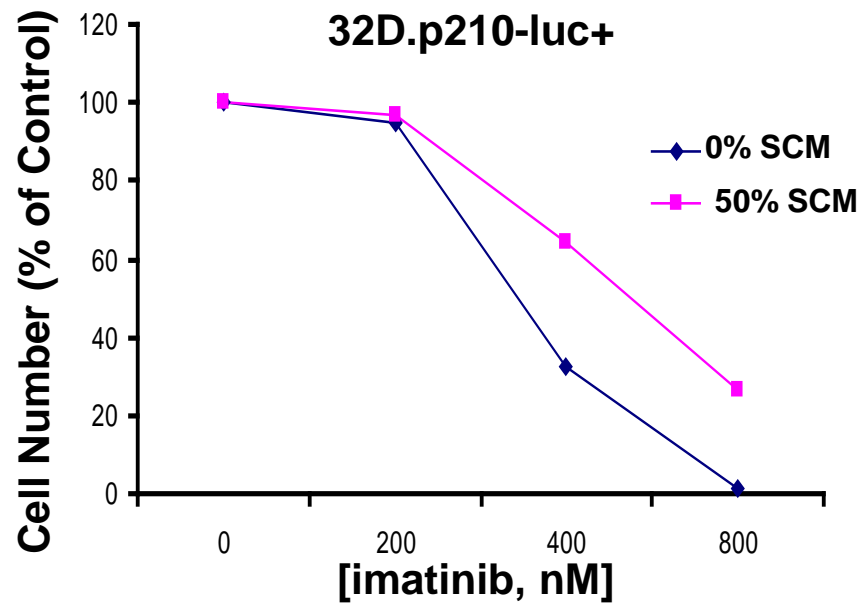**C**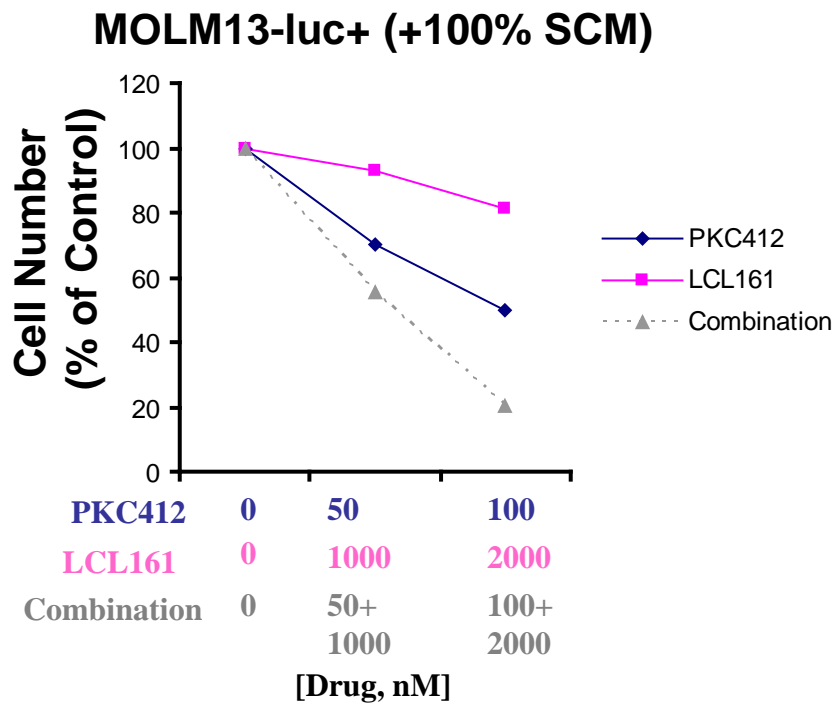

Supp Figure 3

Supplement: NIHMS584747-supplement-Supp_Figure_3.pdf [file NIHMS584747-supplement-Supp_Figure_3.pdf]

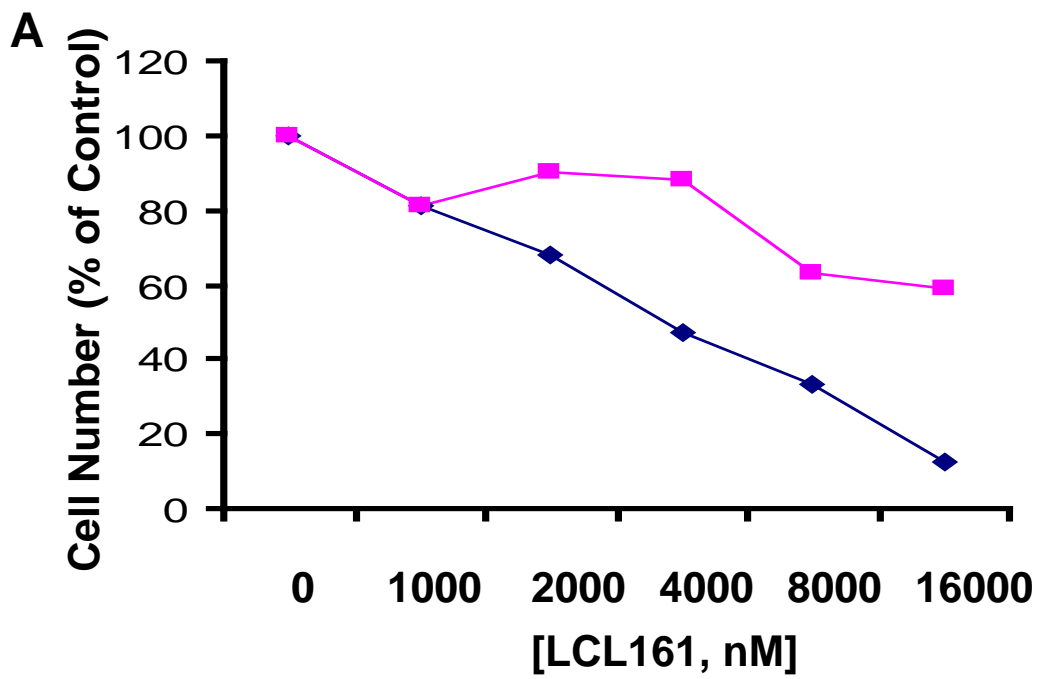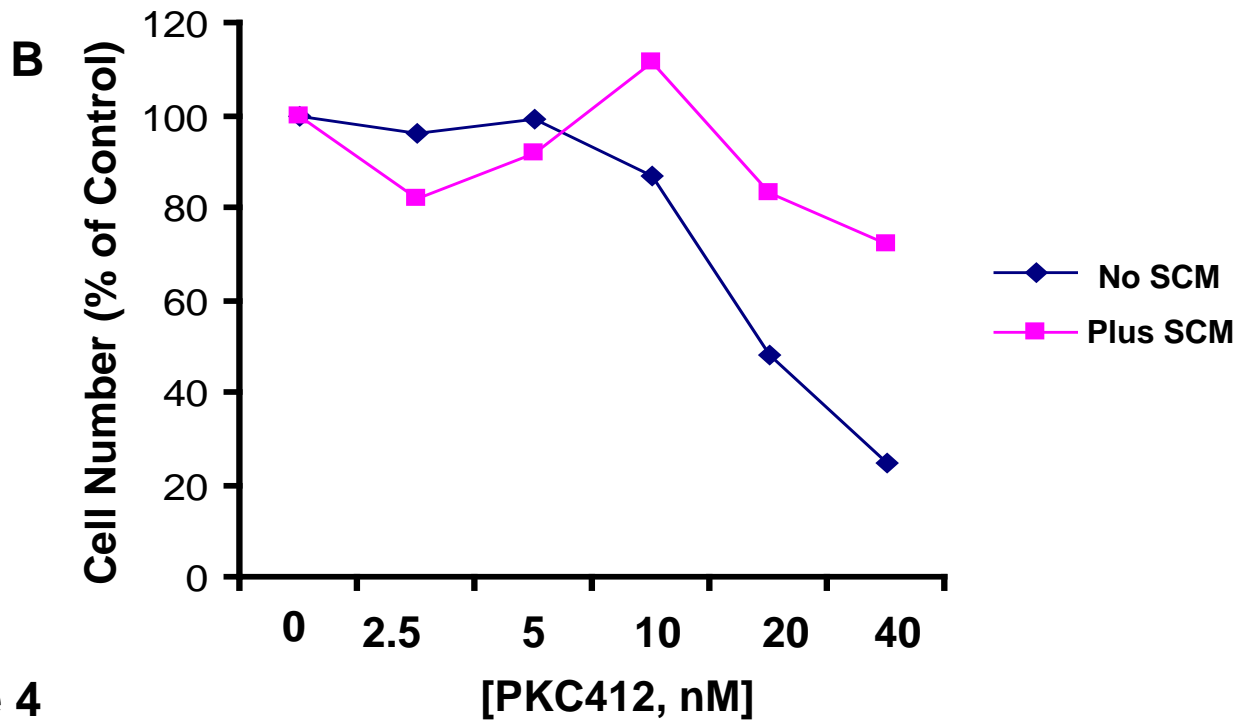

Supplement: NIHMS584747-supplement-Supp_Figure_4.pdf [file NIHMS584747-supplement-Supp_Figure_4.pdf]

# Supp Figure 5

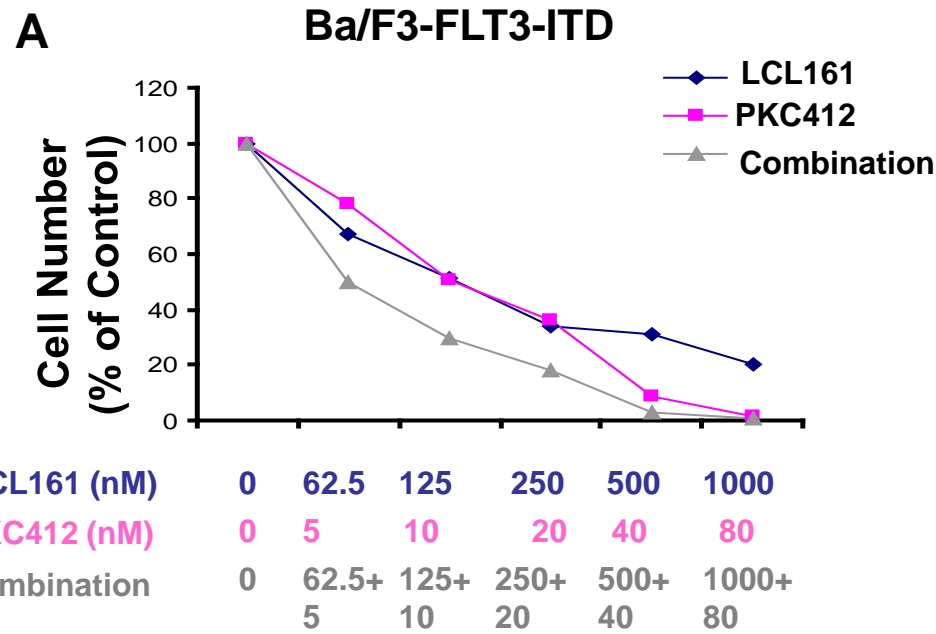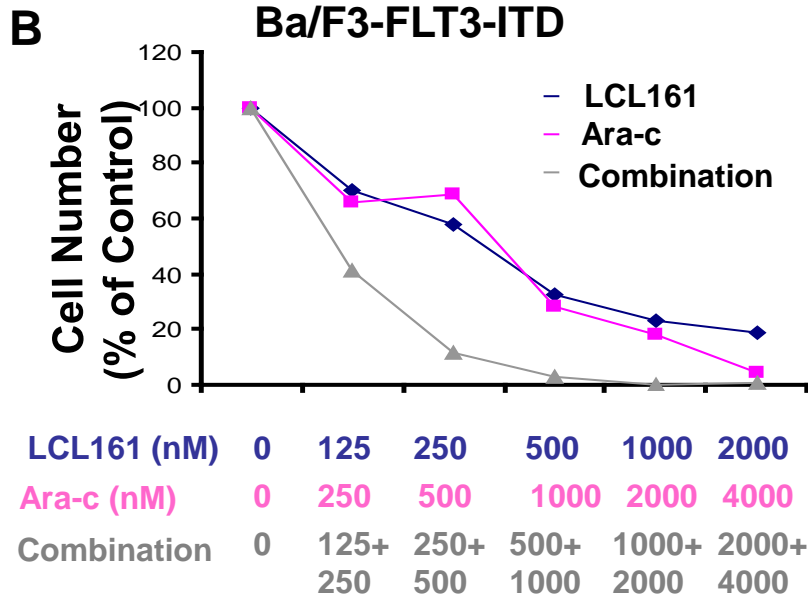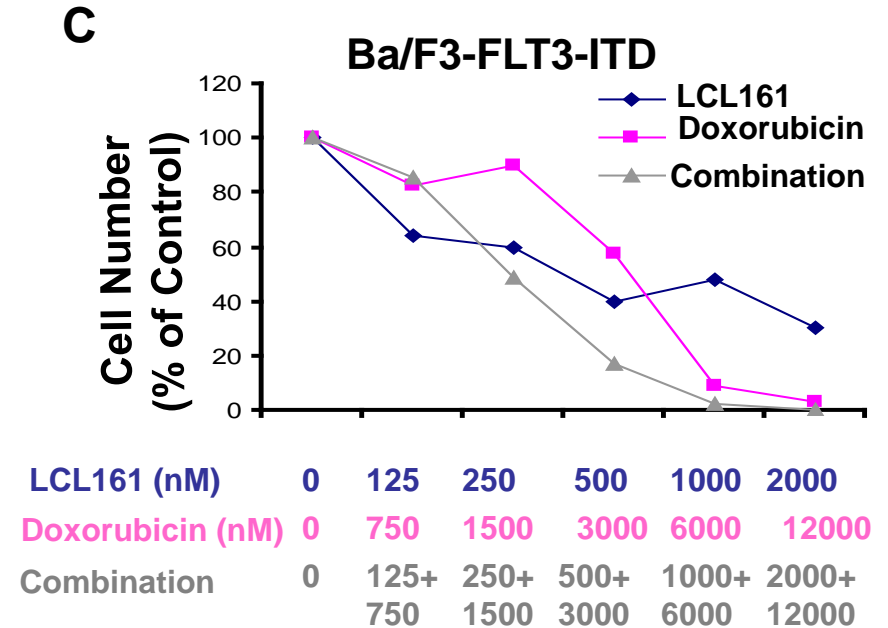

Supplement: NIHMS584747-supplement-Supp_Figure_5.pdf [file NIHMS584747-supplement-Supp_Figure_5.pdf]

### Ba/F3-D835Y

**A**

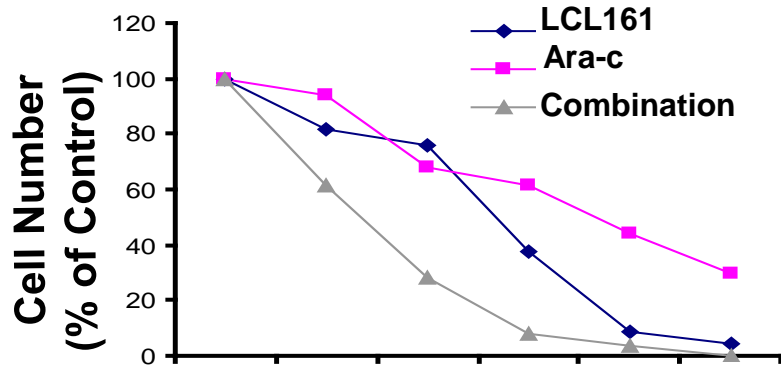

### Ba/F3-D835Y

**B**

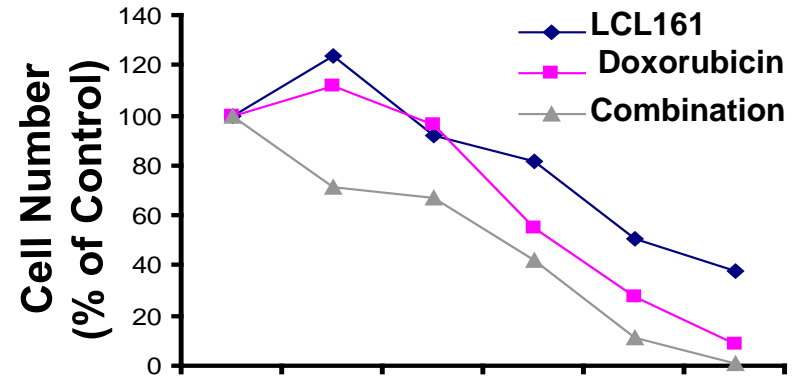

Supplement: NIHMS584747-supplement-Supp_Figure_6.pdf [file NIHMS584747-supplement-Supp_Figure_6.pdf]

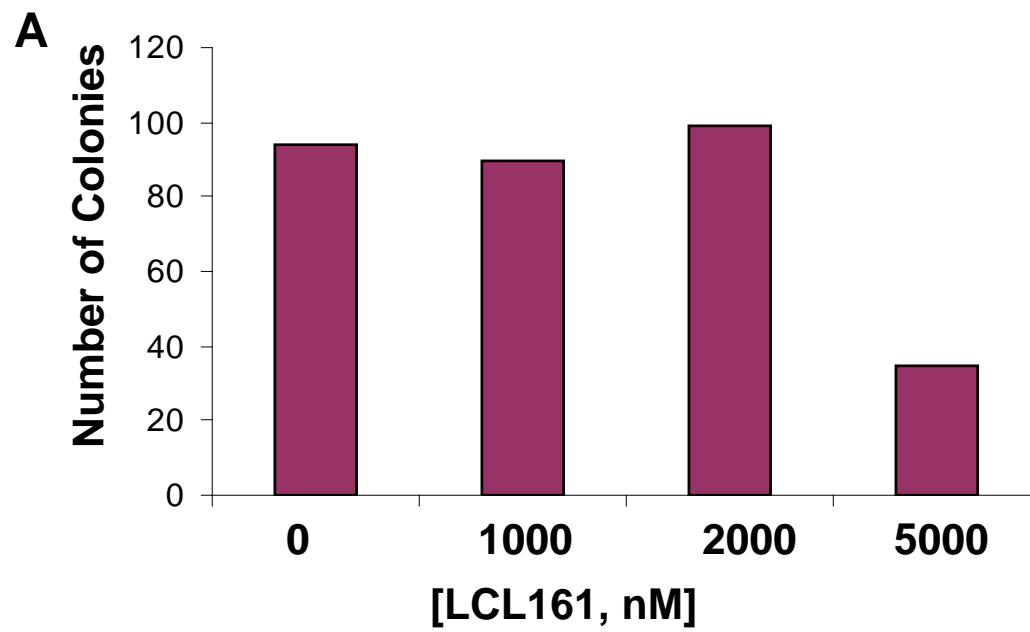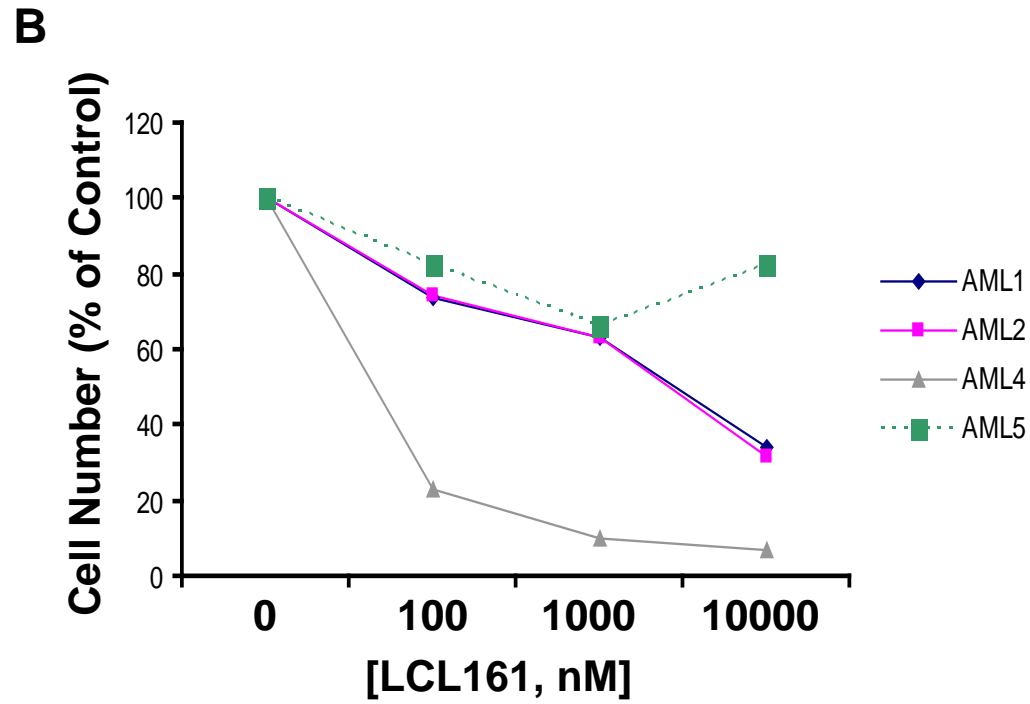

Supp Figure 7

Supplement: NIHMS584747-supplement-Supp_Figure_7.pdf [file NIHMS584747-supplement-Supp_Figure_7.pdf]

**A**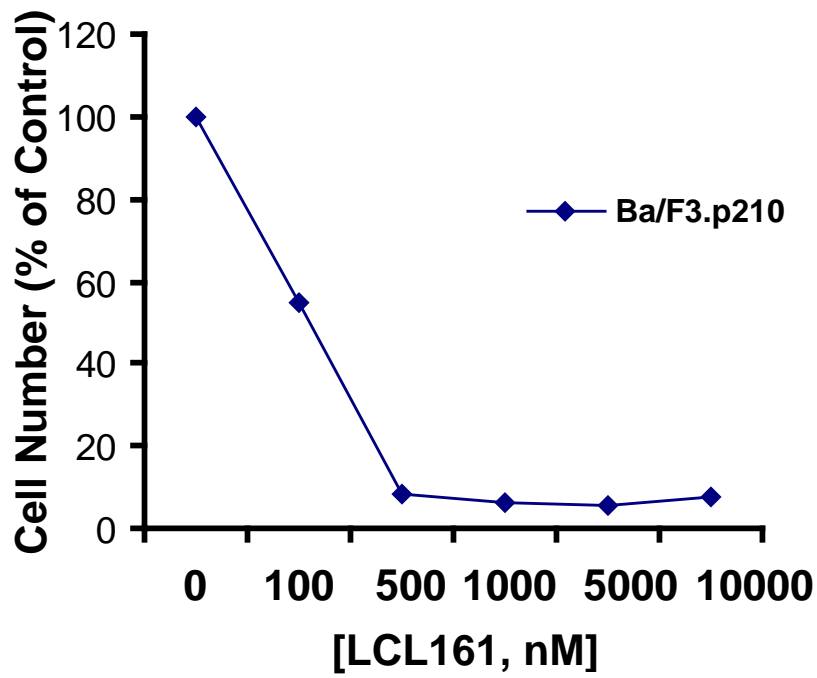**B**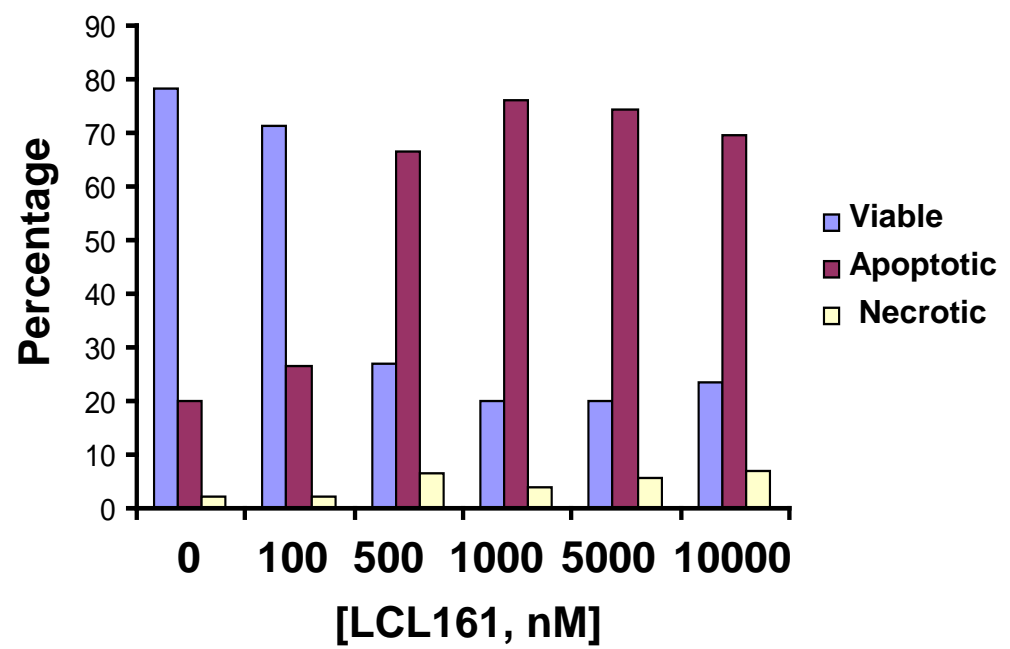**C**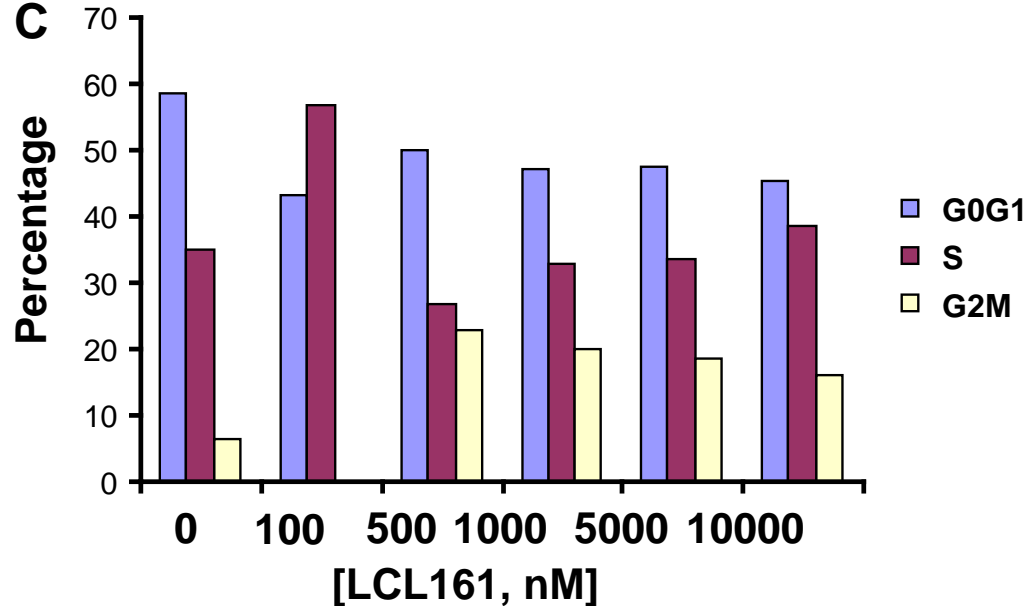

Supp Figure 8

Supplement: NIHMS584747-supplement-Supp_Figure_8.pdf [file NIHMS584747-supplement-Supp_Figure_8.pdf]

Supp Figure 9

A

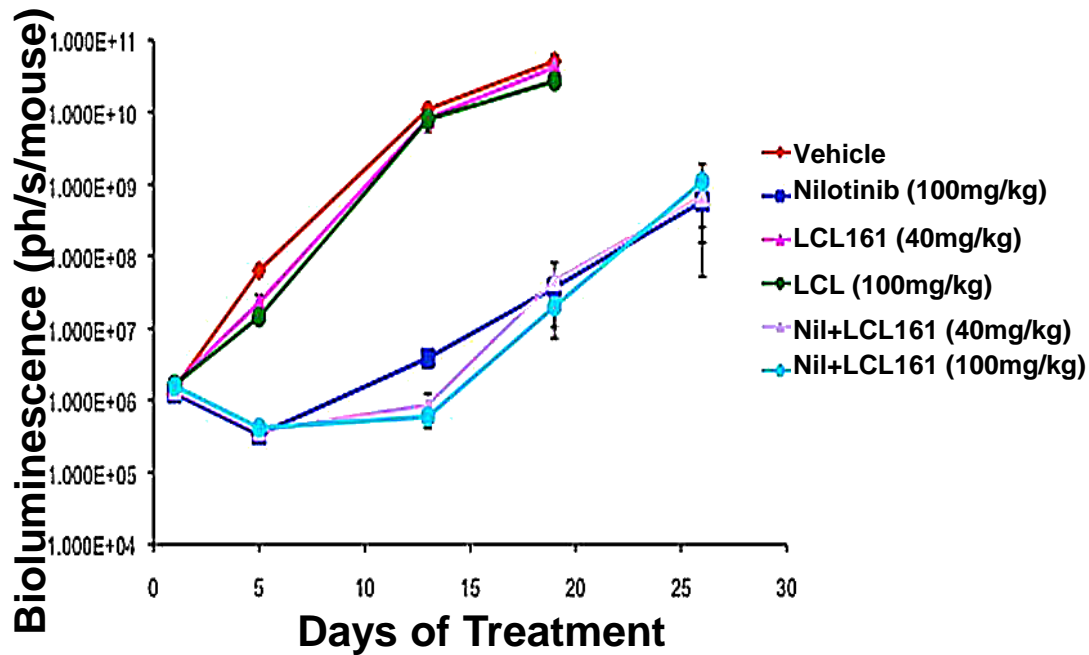

B

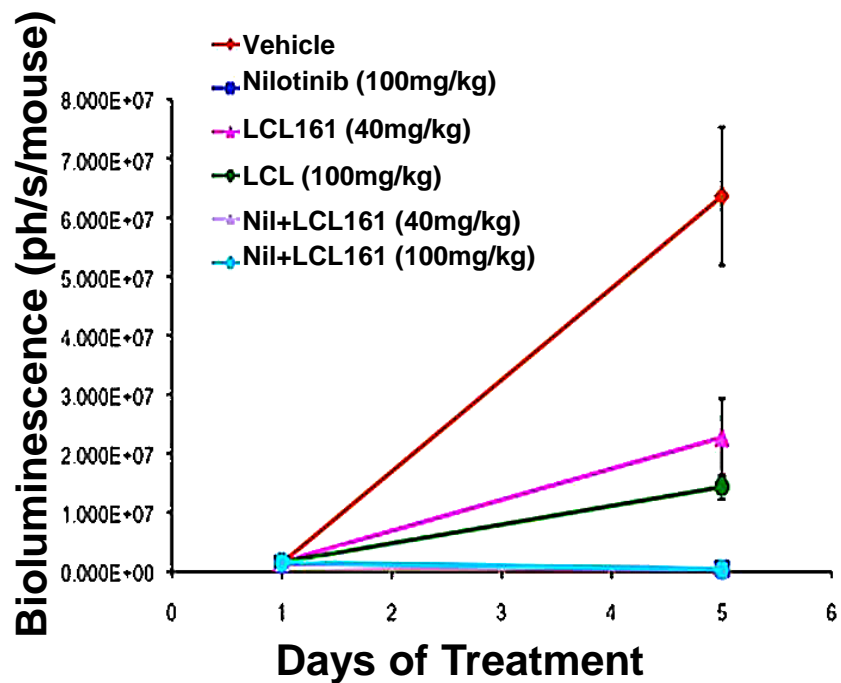

C

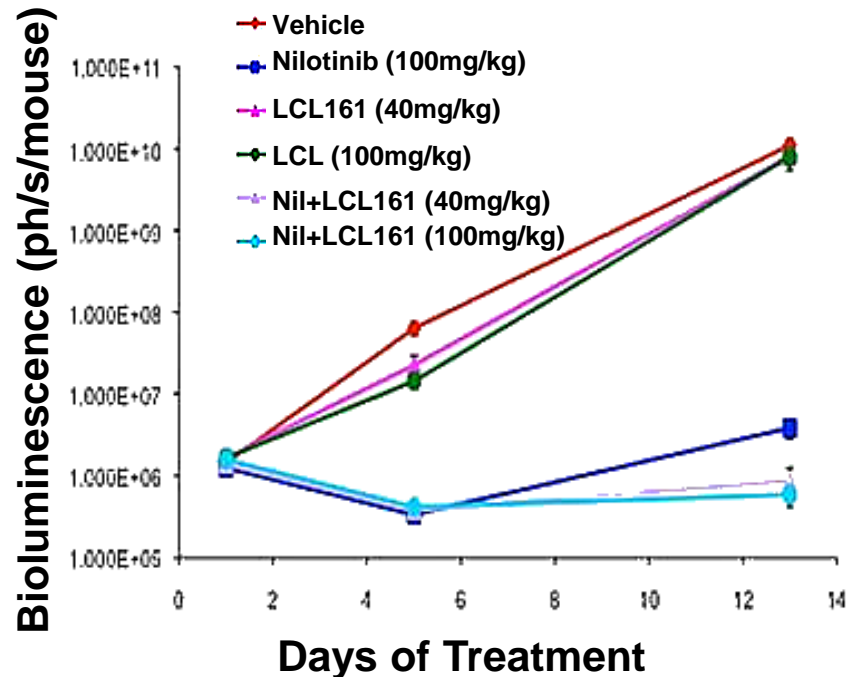

Supplement: NIHMS584747-supplement-Supp_Figure_9.pdf [file NIHMS584747-supplement-Supp_Figure_9.pdf]
